# Supplementary figures and images for: Cooperative regulation by G proteins and Na+ of neuronal GIRK2 K+ channels
Source: eLife journal article supplement (doi:10.7554/elife.15751), 2016-04-13

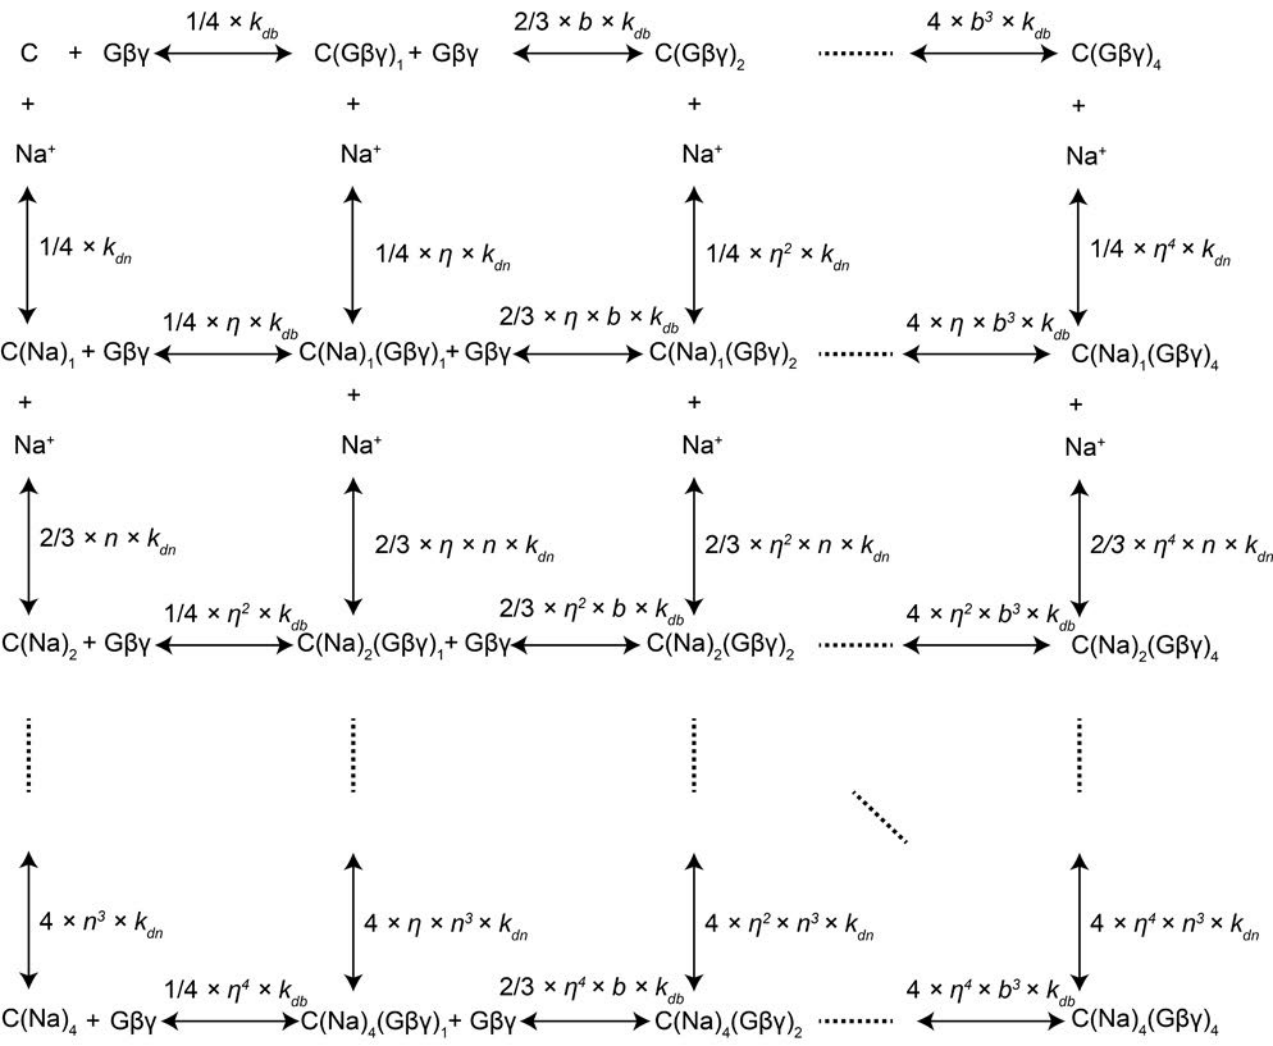

Supplement: supp [file elife-15751-supp-v1.zip]

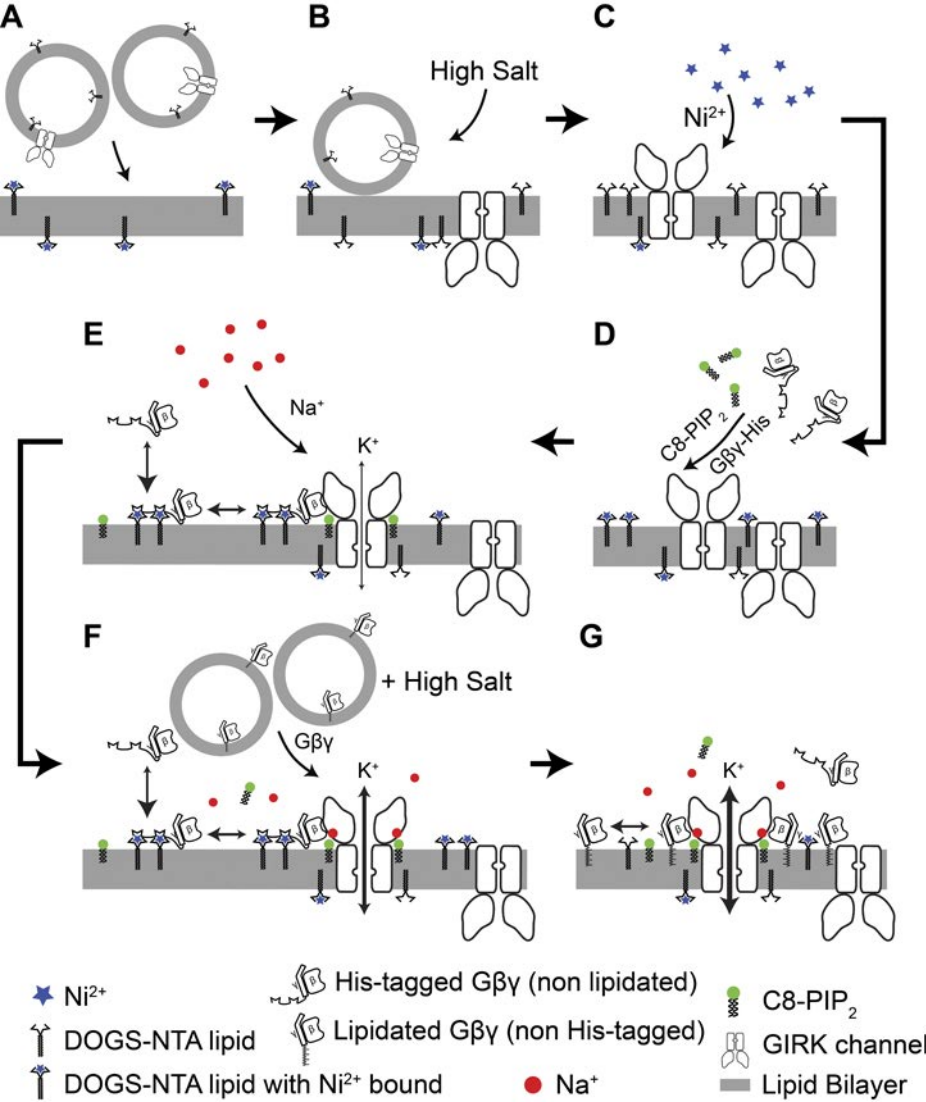

Supplement: supp [file elife-15751-supp-v1.zip]

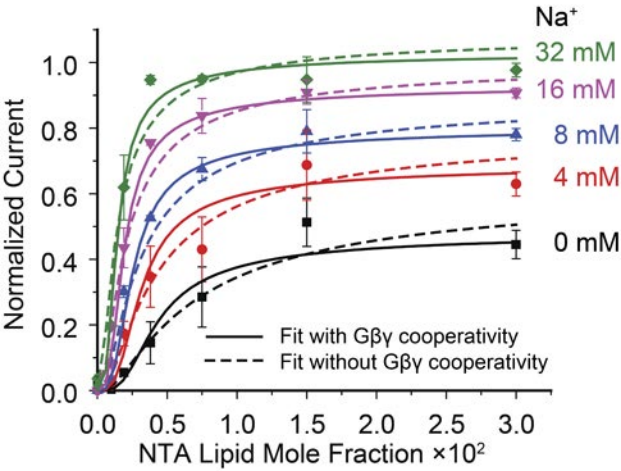

Supplement: supp [file elife-15751-supp-v1.zip]

**A**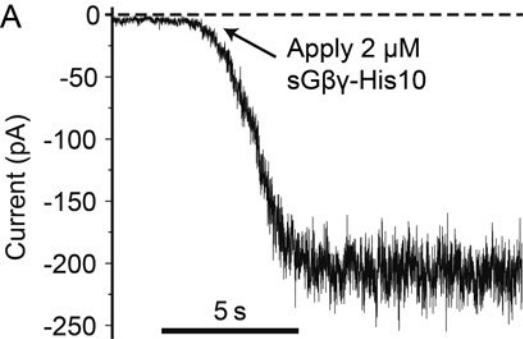**B**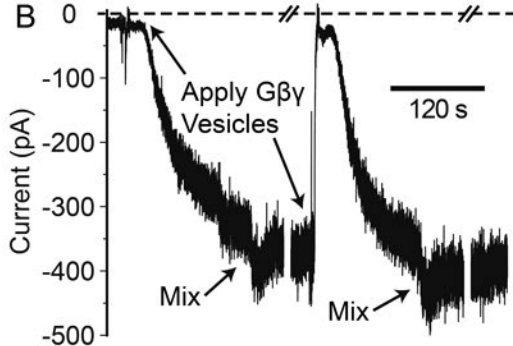

Supplement: supp [file elife-15751-supp-v1.zip]

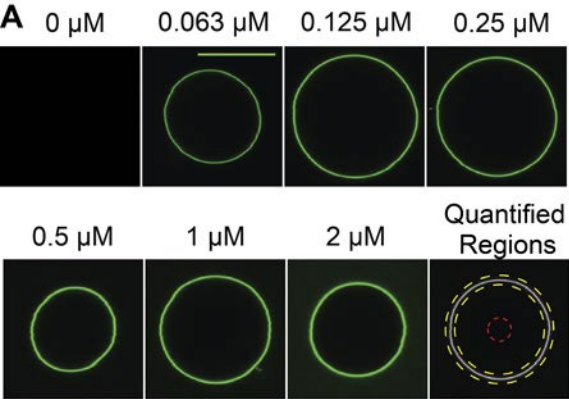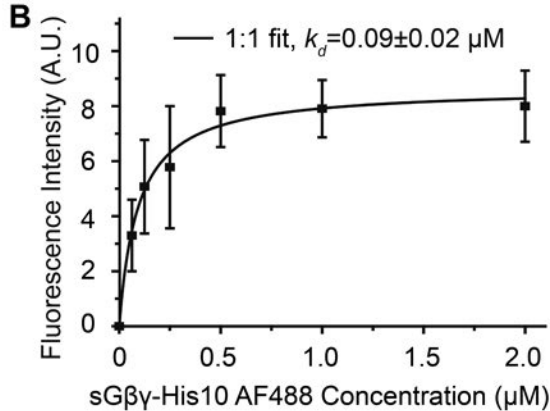

Supplement: supp [file elife-15751-supp-v1.zip]
